# Supplementary material for: The Improvement of CRISPR-Cas9 System With Ubiquitin-Associated Domain Fusion for Efficient Plant Genome Editing
Source: Front Plant Sci. 2020 May 21;11:621. doi: 10.3389/fpls.2020.00621 (PMC7253670; doi:10.3389/fpls.2020.00621)
Supplement: TABLE S1 — Oligos used in this study. [file Table_1.XLSX]

## Sheet: Sheet1
Name	Sequence (5’-3’)	Experimental Purpose
pTX72-Cas9-F	gctctcccatctaagtacgttaactttc	Anneal to make pYLJ01,pYLJ02, pYLJ03 backbone
pTX72-ccdB-R	gagtgatattattgacacgcccgggcgac	Anneal to make pYLJ01,pYLJ02, pYLJ03 backbone
UBA1-A	ttgctcaatactactgccatcaccaccgagctg	Anneal to make SpCas9-SD01 fragment for pYLJ01
UBA1-B	ctcggtggtgatggcagtagtattgagc	Anneal to make SpCas9-SD01 fragment for pYLJ01
UBA1-C	cttcttaggatcagcccttgaagagtagaggtaatcc	Anneal to make SpCas9-SD01 fragment for pYLJ01
UBA1-D	ctctactcttcaagggctgatcctaagaagaagag	Anneal to make SpCas9-SD01 fragment for pYLJ01
UBA2-A	aattgattcttgctcttcatcaccaccgagctg	Anneal to make SpCas9-SD02 fragment for pYLJ02
UBA2-B	gctcggtggtgatgaagagcaagaatca	Anneal to make SpCas9-SD02 fragment for pYLJ02
UBA2-C	ggatcagcccttgactcaaggaggtagtttgcag	Anneal to make SpCas9-SD02 fragment for pYLJ02
UBA2-D	ctacctccttgagtcaagggctgatcctaa	Anneal to make SpCas9-SD02 fragment for pYLJ02
UBA3-A	cttggcttcaaaatcaccaccgagctgtg	Anneal to make SpCas9-SD03 fragment for pYLJ03
UBA3-B	gctcggtggtgattttgaagccaagattgc	Anneal to make SpCas9-SD03 fragment for pYLJ03
UBA3-C	ggatcagcccttgagccgaagaggaacccag	Anneal to make SpCas9-SD03 fragment for pYLJ03
UBA3-D	ggttcctcttcggctcaagggctgatcctaagaa	Anneal to make SpCas9-SD03 fragment for pYLJ03
OsPDS-sg01-F	cggagttggtctttgctcctgcag	Amplifying the OsPDS-sgRNA01 target site
OsPDS-sg01-R	aaacctgcaggagcaaagaccaac	Amplifying the OsPDS-sgRNA01 target site
OsPDS-F1	taggcaacatgtcacttggctctagag	For OsPDS-sgRNA01 target site mutation detection
OsPDS-R1	ctccactacagactgagcacaaagcttc	For OsPDS-sgRNA01 target site mutation detection
OsPDS-sg02-F	cggacttgagcttcaacataagct	Amplifying the OsPDS-sgRNA02 target site
OsPDS-sg02-R	aaacagcttatgttgaagctcaag	Amplifying the OsPDS-sgRNA02 target site
OsPDS-F2	caagattcccagaagtacatcgta	For OsPDS-sgRNA02 target site mutation detection
OsPDS-R2	gagtacatgaagcatttcatcctca	For OsPDS-sgRNA02 target site mutation detection
OsDEP1-sg02-F	cggaactgcagtgcgtgctgcgct	Amplifying the OsDEP1-sgRNA02 target site
OsDEP1-sg02-R	aaacagcgcagcacgcactgcagt	Amplifying the OsDEP1-sgRNA02 target site
OsDEP1-F2	ctagtccagggatgtaatcatctt	For OsDEP1-sgRNA02 target site mutation detection
OsDEP1-R2	gcagttgcactgggacttga	For OsDEP1-sgRNA02 target site mutation detection
OsROC5-sg01-F	cggagcggagaacgacagccggtc	Amplifying the OsROC5-sgRNA01 target site
OsROC5-sg01-R	aaacgaccggctgtcgttctccgc	Amplifying the OsROC5-sgRNA01 target site
OsROC5-F1	ctttgggggcctctttgac	For OsROC5-sgRNA01 target site mutation detection
OsROC5-R1	atctgcgtgcggcgattc	For OsROC5-sgRNA01 target site mutation detection
OsPDS-HTS-F1	taggcaacatgtcacttggctctagag	High-throughput sequencing primer without barcode for OsPDS-sgRNA01 site
OsPDS-HTS-R1	agatagggggcgctcttgcaa	High-throughput sequencing primer without barcode for OsPDS-sgRNA01 site
OsPDS-HTS-F2	aatgctaacttggccagagaa	High-throughput sequencing primer without barcode for OsPDS-sgRNA02 site
OsPDS-HTS-R2	tgtgaatgcaacaataaagggca	High-throughput sequencing primer without barcode for OsPDS-sgRNA02 site
OsDEP1-HTS-F2	ggcataataatctgtactactgcca	High-throughput sequencing primer without barcode for OsDEP1S-sgRNA02 site
OsDEP1-HTS-R2	gaaggggtcttgcagcaact	High-throughput sequencing primer without barcode for OsDEP1-sgRNA02 site
OsROC5-HTS-F1	tattttgttgacaggacaacgc	High-throughput sequencing primer without barcode for OsROC5-sgRNA01 site
OsROC5-HTS-R1	gttggcacagaggagaaggatg	High-throughput sequencing primer without barcode for OsROC5-sgRNA01 site
