# Supplementary material for: The Improvement of CRISPR-Cas9 System With Ubiquitin-Associated Domain Fusion for Efficient Plant Genome Editing
Source: Front Plant Sci. 2020 May 21;11:621. doi: 10.3389/fpls.2020.00621 (PMC7253670; doi:10.3389/fpls.2020.00621)
Supplement: TABLE S2 — Constructs used in this study. [file Table_2.XLSX]

## Sheet: Sheet1
Constructs	Backbone	sgRNA sequence	Experimental Purpose
pGEL028	pGEL027	NA	basic STU-Cas9 backbone
pTX198	pGEL028	gttggtctttgctcctgcag	OsPDS-sgRNA01
pTX199	pGEL028	cttgagcttcaacataagct	OsPDS-sgRNA02
pTX203	pGEL028	aactgcagtgcgtgctgcgc	OsDEP1-sgRNA02
pGEL113	pGEL028	NA	STU-Cas9 backbone with AtRAD23a UBA1 domain
pGEL115	pGEL028	NA	STU-Cas9 backbone with AtRAD23a UBA2 domain
pGEL116	pGEL028	NA	STU-Cas9 backbone with AtDDI1 UBA domain
pYLJ04	pGEL113	cttgagcttcaacataagct	OsPDS-sgRNA02
pYLJ05	pGEL115	cttgagcttcaacataagct	OsPDS-sgRNA02
pYLJ06	pGEL116	cttgagcttcaacataagct	OsPDS-sgRNA02
pYLJ07	pGEL113	aactgcagtgcgtgctgcgc	OsDEP1-sgRNA02
pYLJ08	pGEL115	aactgcagtgcgtgctgcgc	OsDEP1-sgRNA02
pYLJ09	pGEL116	aactgcagtgcgtgctgcgc	OsDEP1-sgRNA02
pYLJ16	pGEL113	gttggtctttgctcctgcag	OsPDS-sgRNA01
pYLJ17	pGEL115	gttggtctttgctcctgcag	OsPDS-sgRNA01
pYLJ18	pGEL116	gttggtctttgctcctgcag	OsPDS-sgRNA01
pYLJ19	pGEL113	gcggagaacgacagccggtc	OsRoc5-sgRNA01
pYLJ20	pGEL115	gcggagaacgacagccggtc	OsRoc5-sgRNA01
pYLJ21	pGEL116	gcggagaacgacagccggtc	OsRoc5-sgRNA01
pYLJ22	pGEL028	gcggagaacgacagccggtc	OsRoc5-sgRNA01
